# Supplementary material for: EPICANCER—Cancer Patients Presenting to the Emergency Departments in France: A Prospective Nationwide Study
Source: MDPI journal article supplement (doi:10.3390/jcm9051505), 2020-05-17
Supplement: s1 [file s1]

**Table S2.** Sensitivity multivariable analyses imputing the missing outcomes either all by death or alive status, or by simple stochastic imputation, assuming missing completely at random outcomes, based on the observed mortality of 13.4%

|                                          | Missing outcomes imputed by death<br>N=896 - deaths=151 |                   | Missing outcomes imputed by alive<br>N=896 - deaths=120 |                   | Missing outcomes imputed by stochastic imputation<br>N=896 - deaths=122 |                  |
|------------------------------------------|---------------------------------------------------------|-------------------|---------------------------------------------------------|-------------------|-------------------------------------------------------------------------|------------------|
|                                          | OR (95% CI)                                             | <i>p</i>          | OR (95% CI)                                             | <i>p</i>          | OR (95% CI)                                                             | <i>p</i>         |
| <b>Male gender</b>                       | 1.69 (1.13-2.53)                                        | 0.01              | 1.58 (1.02-2.47)                                        | 0.04              | 1.56 (1.01-2.43)                                                        | 0.048            |
| <b>Age (≥60 years)</b>                   | 1.65 (0.93-2.95)                                        | 0.09              | 1.83 (0.94-3.54)                                        | 0.07              | 1.69 (0.89-3.23)                                                        | 0.1              |
| <b>Fatigue</b>                           | 1.80 (1.16-2.77)                                        | 0.008             | 1.51 (0.93-2.44)                                        | 0.09 <sup>d</sup> | 1.48 (0.92-2.40)                                                        | 0.1 <sup>d</sup> |
| <b>Poor performance status (&gt;2)</b>   | 2.47 (1.62-3.79)                                        | <0.0001           | 2.82 (1.79-4.47)                                        | 0.00001           | 2.85 (1.80-4.51)                                                        | <0.00001         |
| <b>Solid malignancy<sup>a</sup></b>      | 2.79 (1.29-6.03)                                        | 0.009             | 2.94 (1.22-7.09)                                        | 0.02              | 3.03 (1.25-7.30)                                                        | 0.01             |
| <b>Uncontrolled malignancy</b>           | 2.34 (1.49-3.66)                                        | 0.0002            | 2.07 (1.27-3.38)                                        | 0.003             | 2.18 (1.33-3.58)                                                        | 0.002            |
| <b>Neurological disorders</b>            | 2.08 (1.25-3.49)                                        | 0.005             | 2.17 (1.25-3.78)                                        | 0.006             | 2.29 (1.32-3.97)                                                        | 0.003            |
| <b>High Shock-index<sup>b</sup> (≥1)</b> | 1.45 (0.85-2.48)                                        | 0.17 <sup>c</sup> | 1.93 (1.11-3.36)                                        | 0.02              | 1.83 (1.05-3.19)                                                        | 0.03             |
| <b>Oxygen therapy</b>                    | 2.23 (1.45-3.44)                                        | 0.0003            | 2.65 (1.67-4.20)                                        | <0.0001           | 2.85 (1.80-4.52)                                                        | <0.00001         |

ED emergency department, OR odds ratio, 95% CI 95% confidence interval

<sup>a</sup> Reference: hematological malignancy

<sup>b</sup> Heart rate/systolic arterial blood pressure

<sup>c</sup> Shock-index was no more associated with the outcome

<sup>d</sup> Fatigue was no more associated with the outcome
