# Supplementary material for: EPICANCER—Cancer Patients Presenting to the Emergency Departments in France: A Prospective Nationwide Study
Source: MDPI journal article supplement (doi:10.3390/jcm9051505), 2020-05-17
Supplement: s1 [file s1]

**Table S1.** Collaborators and members of the Initiatives de Recherche aux Urgences (IRU) research network who participated in the study

| IRU local investigator                       | Center                                     | City              |
|----------------------------------------------|--------------------------------------------|-------------------|
| Patrice SERRE ; Noémie MARCHAND              | CH FLEYRIAT                                | BOURG-EN-BRESSE   |
| Marie MAS                                    | CLINIQUE CONVERT                           | BOURG-EN-BRESSE   |
| Stéphane BLAIN                               | HOPITAL PRIVE D'AMBERIEU EN BUGEY          | AMBERIEU-EN-BUGEY |
| Hélène KEMORGANT                             | CH VICHY                                   | VICHY             |
| Aurélié ARNAUD                               | CHU MONTLUÇON                              | MONTLUCON         |
| Céline OCCELLI                               | CHU NICE                                   | NICE              |
| Edouard JACQUET                              | CHI DES VALLEES D'ARIEGE                   | FOIX              |
| Hélène QUESTIAUX                             | CH TROYES                                  | TROYES            |
| Magali KRAIF ; Marc POYEN ; Patrick GERBEAUX | H TIMONE - LA CONCEPTION                   | MARSEILLE         |
| Hugo LENGLET                                 | BATAILLON DES MARINS POMPIERS DE MARSEILLE | MARSEILLE         |
| Delphine LEVY                                | CH DU PAYS D'AIX                           | AIX-EN-PROVENCE   |
| Yves COSSE                                   | CH BAYEUX                                  | BAYEUX            |
| Bastien MALOSSANE                            | CH AURILLAC                                | AURILLAC          |
| Stéphane GILLET                              | H D'ANGOULEME                              | ANGOULEME         |
| Marc PETER                                   | CHG DE JONZAC                              | JONZAC            |
| Jean HELIN ; Jeannot RAMAMONJISOA            | CH BOURGES                                 | BOURGES           |
| Aurélié AVONDO; Didier HONNART; Benoit SAHUC | CHU DIJON                                  | DIJON             |
| Christophe BARBERIS                          | CH SAINT-BRIEUC                            | SAINT-BRIEUC      |
| Abdo KHOURY                                  | CH BESANCON                                | BESANCON          |
| Eloi NENERT                                  | CH INTERCOMMUNAL DE HAUTE-COMTE            | PONTARLIER        |
| Ali FAOUR                                    | CH BERNAY                                  | BERNAY            |
| Jérôme FAURE PONTIER                         | CH VERNON                                  | VERNON            |

|                                                    |                                       |                      |
|----------------------------------------------------|---------------------------------------|----------------------|
| Béatrice GAIDAMOUR                                 | CH EVREUX                             | EVREUX               |
| Anastasia DESSENA ; Francesca DONATI               | CH DREUX                              | DREUX                |
| Marjorie COUTANT                                   | CH PAYS DE MORLAIX                    | MORLAIX              |
| Anne LE COAT                                       | HIA BREST                             | BREST                |
| Alice HURGON                                       | CH COMMINGES PYRENEES CHCP ST GAUDENS | SAINT-GAUDENS        |
| Manon HEBRARD                                      | CHU TOULOUSE                          | TOULOUSE             |
| Thierry BABET ; Rishad VALLLY                      | CHU PELLEGRIN                         | BORDEAUX             |
| Pascal BISSOLOKELE                                 | CH STE FOY LA GRANDE                  | SAINTE-FOY-LA-GRANDE |
| Julliane BOSC                                      | CH LIBOURNE                           | LIBOURNE             |
| Simeon SIAGNI                                      | CH DE LA HAUTE GIRONDE                | BLAYE                |
| Justine BEREAU ; Sandrine DOJAT                    | CH SAINT-ANDRE                        | BORDEAUX             |
| Sophie LEFEBVRE                                    | CHU MONTPELLIER                       | MONTPELLIER          |
| Myranné LALOUE ; Pauline LEGOFF                    | CHU RENNES                            | RENNES               |
| Sophie DABIN ; POUCHARD                            | CHU TOURS                             | TOURS                |
| Cédric FALCON; Maxime MAIGNAN                      | CHU GRENOBLE                          | GRENOBLE             |
| Ernesto MAIELLO                                    | CH VIENNE                             | VIENNE               |
| Vivien BRENKMANN; Cyrielle CLAPE; Caroline SANCHEZ | CHU GRENOBLE                          | GRENOBLE             |
| Pierre ACHACHE                                     | GH DU NORD DAUPHINE                   | BOURGOIN JALLIEU     |
| Yves DUFFAIT                                       | CH LONS LE SAUNIER                    | LONS-LE-SAUNIER      |
| Jean FABRE                                         | CH DAX                                | DAX                  |
| Jérôme DIMET                                       | CH MONT DE MARSAN                     | MONT-DE-MARSAN       |
| Mikael MARTINEZ                                    | CH FOREZ                              | MONTBRISON           |
| Coralie CHASSIN                                    | CH ROANNE                             | ROANNE               |
| Hosam HADJADJ, Nesrine BENAOUICHA                  | CHU NANTES                            | NANTES               |

|                      |                                         |                                      |
|----------------------|-----------------------------------------|--------------------------------------|
| Mathieu OBERLIN      | CH CAHORS                               | CAHORS                               |
| Pierre-Arnaud FORT   | CH AGEN-NERAC                           | AGEN-NERAC                           |
| Delphine DOUILLET    | CHU ANGERS                              | ANGERS                               |
| Oriane VICENZI       | CH CHALONS EN CHAMPAGNE - STE MENEHOULD | CHALONS-EN-CHAMPAGNE - STE-MENEHOULD |
| Pierre-Etienne COLOT | CHU REIMS                               | REIMS                                |
| Anthony MILLET       | CH LAVAL                                | LAVAL                                |
| Sabine DAGUERRE      | CH PONT A MOUSSON                       | PONT-A-MOUSSON                       |
| Lise BLANCHARD       | CH VERDUN HOP ST NICOLAS                | VERDUN                               |
| Alexandre TANNEAU    | CH BRETAGNE SUD                         | LORIENT                              |
| Christophe ROTHMANN  | CHR METZ - H MERCY                      | METZ                                 |
| Eric GRAVE           | CH DUNKERQUE                            | DUNKERQUE                            |
| Céline BORZYMOWSKI   | CH VALENCIENNES                         | VALENCIENNES                         |
| Sylvain THIRIEZ      | CH ROUBAIX                              | ROUBAIX                              |
| Jean-Baptiste LEZY   | CH ARMENTIERES                          | ARMENTIERES                          |
| Romain LECOMTE       | CH CAMBRAI                              | CAMBRAI                              |
| Lila ABDELLI         | CH TOURCOING                            | TOURCOING                            |
| Quentin RIVIERE      | CH BEAUVAIS                             | BEAUVAIS                             |
| Claire HOCHART       | CH BETHUNE                              | BETHUNE                              |
| Karine HUMBERT       | POLYCLINIQUE DE LA CLARENCE             | DIVION                               |
| Antoine DE LUCCA     | CH CALAIS                               | CALAIS                               |
| Sonia AJIMI          | CHU CLERMONT-FERRAND                    | CLERMONT-FERRAND                     |
| Daniel PIC           | CH PAUL ARDIER ISSOIRE                  | ISSOIRE                              |
| Guilhem SOLA         | CH GUY THOMAS RIOM                      | RIOM                                 |
| Adrien PUIG          | H DE LANNEMEZAN                         | LANNEMEZAN                           |

|                                                                       |                             |                    |
|-----------------------------------------------------------------------|-----------------------------|--------------------|
| Julie ROSENBLATT                                                      | CH DE BIGORRE               | TARBES             |
| Pierrick LE BORGNE; Matthieu DELLEMBACH ; Carmen HAMMANN DURR         | CHU STRASBOURG HAUTEPIERRE  | STRASBOURG         |
| Gautier DROMSON                                                       | CH SELESTAT - OBERNAI       | SELESTAT           |
| Caroline WITT                                                         | CHI DE LA LAUTER            | WISSEMBOURG        |
| Kasarra BEN HAMMOUDA                                                  | CH COLMAR                   | COLMAR             |
| Jacques SCHMITT                                                       | CH MULHOUSE (GHRMSA)        | MULHOUSE           |
| Marine DELAROCHE ; Laurent JACQUIN                                    | CHU LYON (HERRIOT)          | LYON               |
| Marion DOUPLAT                                                        | CENTRE HOSPITALIER LYON SUD | LYON               |
| Sylvain CHARREYRE                                                     | CHU LYON                    | LYON               |
| Séverine GOSSELIN                                                     | CH MACON                    | MACON              |
| Adrien PICAUD                                                         | CH LE MANS                  | LE MANS            |
| Anaëlle BATICLE                                                       | CH CHAMBERY                 | CHAMBERY           |
| Alban FOREL ; Cécile VALLOT                                           | CH ANNECY                   | ANNECY             |
| Claire VALLENET                                                       | CH ALPES LEMAN              | CONTAMINE-SUR-ARVE |
| Marie-Laurence FIEVET-BROCHOT ; Evelyne DUBREUCQ et Anne-Laure PAQUET | CHU PITIE-SALPETRIERE       | PARIS              |
| Pierre-Clément THIEBAUD                                               | CHU ST ANTOINE              | PARIS              |
| Jennifer TRUCHOT                                                      | CHU LARIBOISIERE            | PARIS              |
| Lionel LAMHAUT                                                        | CHU NECKER                  | PARIS              |
| Fred VOISIN; Florence DUMAS                                           | CHU COCHIN                  | PARIS              |
| Anaïs GUINCESTRE                                                      | CHU HEGP                    | PARIS              |
| Eloïse TRABATTONNI ; Jean Luc AIM                                     | GH ST JOSEPH                | PARIS              |
| Eric BURGGRAFF                                                        | CHU TENON                   | PARIS              |
| Laurent PEREIRA                                                       | CHU BICHAT                  | PARIS              |
| David BLONDEEL; Céline HOFFMANN                                       | CROIX ST SIMON              | PARIS              |

|                                               |                           |                      |
|-----------------------------------------------|---------------------------|----------------------|
| Madze ANANI MEKLE ; Béatrice DEWEVRE          | GH LE HAVRE               | LE HAVRE             |
| Quentin FOUBERT; Adrien LEBROZIDEC            | CHI CAUX VALLEE DE SEINE  | LILLEBONNE           |
| Luc-Marie JOLY ; Mélanie ROUSSEL              | CHU ROUEN                 | ROUEN                |
| Fabrice BOISHARDY; Flore GEERLANDT            | CHIC ELBEUF-LOUVIERS      | ELBEUF - LOUVIERS    |
| Maud FLAMBARD                                 | CH FONTAINEBLEAU          | FONTAINEBLEAU        |
| Omar BEKHODJA ; TOUMANI Samir                 | GH DE L'EST FRANCILIEN    | COULOMMIERS          |
| Chloé HOZE                                    | H PRIVE MARNE CHANTEREINE | BROU-SUR-CHANTEREINE |
| Laurence SZTULMAN                             | GH DE L'EST FRANCILIEN    | MEAUX                |
| Sandra BERNARD                                | H F. QUESNAY              | MANTES-LA-JOLIE      |
| Laurence BERTON                               | CH VERSAILLES             | VERSAILLES           |
| Thomas LEREDU; Olivier RICHARD; Ludovic DALLE | CH VERSAILLES-LE CHESNAY  | VERSAILLES           |
| Mathieu VIOLEAU; Pierre-Alexis BOURRY         | CH NIORT                  | NIORT                |
| Catherine VELLY; Helene JOUDRIER              | CH TOULON – LA SEYNE      | TOULON               |
| Cyril COUILLARD, Jean TIDA                    | CH SUD VENDEE             | FONTENAY-LE-COMTE    |
| Philippe FRADIN; Emelyne CWICKLINSKI          | CHD VENDEE LA ROCHE/YON   | LA ROCHE-SUR-YON     |
| Claudie AUDRAIN                               | CH LUCON                  | LUCON                |
| Pascal GABY                                   | CH G.CLEMENCEAU           | MONTAIGU             |
| Nicolas MARJANOVIC; Carine SUROUX             | CHU POITIERS              | POITIERS             |
| Christine VALLEJO                             | CHU LIMOGES               | LIMOGES              |
| Marie-Paule BITAR                             | CH DE REMIREMONT          | REMIREMONT           |
| Ayoub TOUIHAR                                 | CH AUXERRE                | AUXERRE              |
| Trung Hung TA ; Andrianjafy HERY              | CHG LONGJUMEAU            | LONGJUMEAU           |
| Laurène VASSEUR                               | CORBEIL-ESSONNES          | CORBEIL-ESSONNES     |
| Sébastien BEAUNE                              | CHU AMBROISE PARE         | BOULOGNE             |

|                                                      |                             |                          |
|------------------------------------------------------|-----------------------------|--------------------------|
| Gaëlle LE BAIL                                       | CHU RAYMOND POINCARE        | GARCHES                  |
| Siva PRABAKAR                                        | CHU BEAUJON                 | CLICHY                   |
| Julie CELERIER                                       | H FRANCO-BRITANIQUE         | LEVALLOIS-PERRET         |
| Nicolas JAVAUD                                       | CHU LOUIS MOURIER           | COLOMBES                 |
| Anna BOUCHARA                                        | CHI R.BALLANGER             | AULNAY-SOUS-BOIS         |
| Romain DUFAU; Luis SEGURA                            | CHU JEAN VERDIER            | BONDY                    |
| Emmanuelle ZAMPARINI                                 | CH MONTFERMEIL              | MONTFERMEIL              |
| Sheila GASMI, Frédéric ADNET                         | CHU AVICENNE                | BOBIGNY                  |
| Astrid GUILLOIS                                      | HOPITAL DE DELAFONTAINE     | SAINT-DENIS              |
| Stéphane DIEZ                                        | CHU BICETRE                 | LE KREMLIN-BICETRE       |
| Mohamed KHALID ; Lionel NAKAD                        | CHU HENRI MONDOR            | CRETEIL                  |
| Layla YAHYAOU                                        | CHI CRETEIL                 | CRETEIL                  |
| Julie ZUNDEL; Corine BERGERON                        | CHI VILLENEUVE ST GEORGES   | VILLENEUVE-SAINT-GEORGES |
| Marie-Valérie BOURHIS                                | HIA BEGIN                   | SAINT-MANDE              |
| Xavier BAERMAN; Catherine LEGALL; Nasro BENREZZAK    | CH ARGENTEUIL               | ARGENTEUIL               |
| François DUPAS; Sandrine GOULVENT; Véronique SANH    | CH RENE DUBOS               | PONTOISE                 |
| Laurie REAUX ; Marie-Laure DEVAUD ; Yves DUMORA      | CH BEAUMONT SUR OISE        | BEAUMONT-SUR-OISE        |
| Maxime CANTREAU; Nathalie ROUDIAK ; Mustapha YOUSSEF | CH GONESSE                  | GONESSE                  |
| Sylvie POTHULT; Céline MAISONDIEU                    | CHU FORT DE FRANCE          | MARTINIQUE               |
| Guillaume MICHOT; Flore PINEAU                       | CHU SUD REUNION BELLEPIERRE | REUNION                  |
| Maylis DOUINE; Mamadou SOW                           | CH CAYENNE                  | CAYENNE                  |
| Yann-Erick CLAESSENS                                 | CH PRINCESSE GRACE          | MONACO                   |
| Kouchiar AZARNOUSH                                   | CH FRIBOURG                 | FRIBOURG                 |
